# Supplementary material
Source: PubMed Central journal article supplement (PMC2944314)
Supplement: 00066.2010_1.pdf [file 00066.2010_1.pdf]

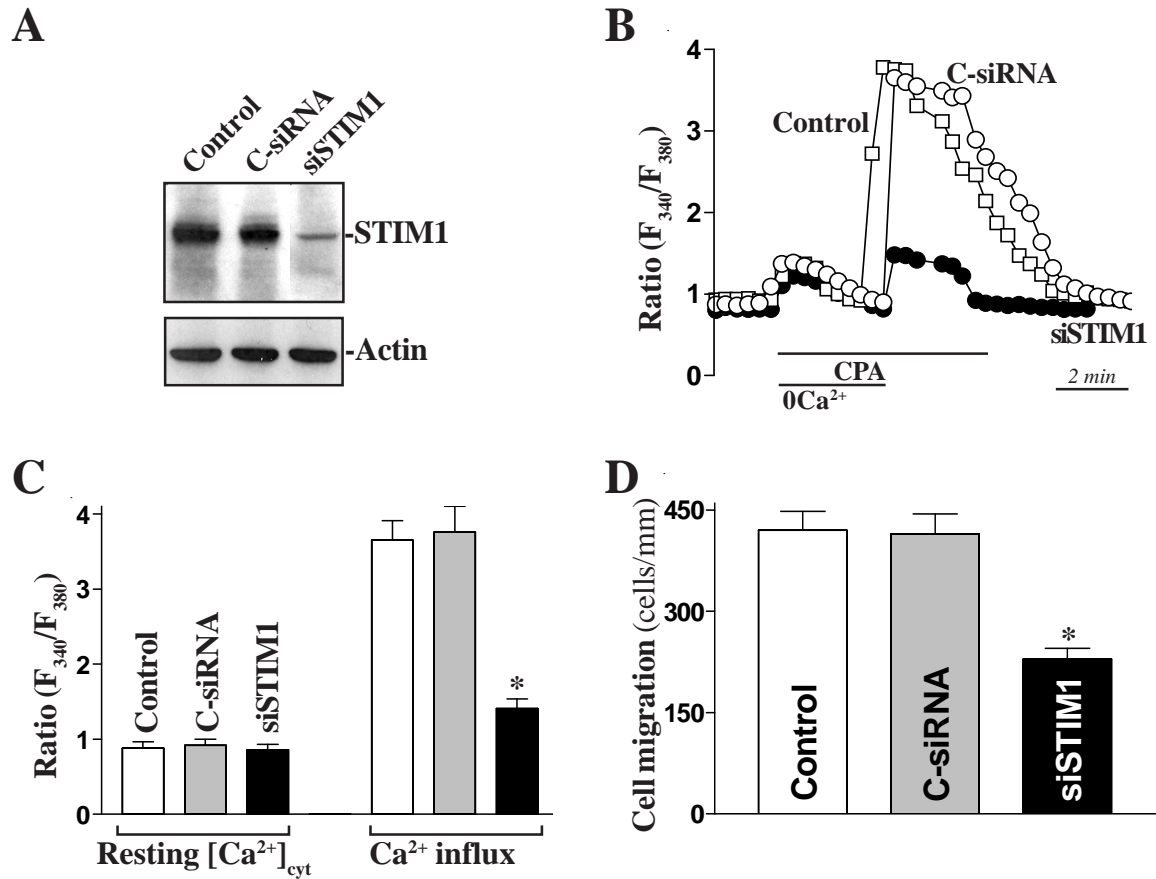

**Fig. S1.** Changes in the levels of Ca<sup>2+</sup> influx and cell migration after STIM1 silencing in differentiated IEC-Cdx2L1 cells. **A:** representative STIM1 immunoblots. Whole-cell lysates were harvested for Western blot analysis after cells were transfected with either siSTIM1 or C-siRNA for 48 h. **B:** representative records showing the time course of [Ca<sup>2+</sup>]<sub>cyt</sub> changes after exposure to CPA in the absence (0Ca<sup>2+</sup>) or presence of extracellular Ca<sup>2+</sup> in cells described in **A**. **C:** summarized data showing resting [Ca<sup>2+</sup>]<sub>cyt</sub> (left) and the amplitude of CPA-induced Ca<sup>2+</sup> influx (right) from cells described in **B**. Values are means  $\pm$  SE;  $n = 20$ . \* $P < 0.05$  compared with controls and cells transfected with C-siRNA. **D:** changes in cell migration 6 h after wounding in cells described in **A**. Values are means  $\pm$  SE of data from 6 dishes. \* $P < 0.05$  compared with controls and cells transfected with C-siRNA.
